# Supplementary material for: Activation of Non-Canonical Autophagic Pathway through Inhibition of Non-Integrin Laminin Receptor in Neuronal Cells
Source: MDPI journal article supplement (doi:10.3390/cells11030466), 2022-01-29
Supplement: s1 [file s1]

## Supplementary Material

### Activation of Non-Canonical Autophagic Pathway through Inhibition of Non-Integrin Laminin Receptor in Neuronal Cells

Adriana Limone <sup>1</sup>, Iolanda Veneruso <sup>1,2</sup>, Antonella Izzo <sup>1</sup>, Maurizio Renna <sup>1</sup>, Raffaella Bonavita <sup>1</sup>,

Silvia Piscitelli <sup>1</sup>, Gaetano Calì <sup>3</sup>, Sergio De Nicola <sup>4,5</sup>, Patrizia Riccio <sup>1</sup>, Valeria D'Argenio <sup>2,6</sup>,

Antonio Lavecchia <sup>7</sup> and Daniela Sarnataro <sup>1</sup>

**Table S1.** Full list of the primers used for qPCR analysis.

| Gene          | Strand | Primer's Sequence (5'→3') | Tm    | GC%   | Primer's Length (bp) | Amplicon's Size |
|---------------|--------|---------------------------|-------|-------|----------------------|-----------------|
| <i>BECN1</i>  | FW     | TGAATGTCAGAACTACAAACGC    | 57.27 | 40.91 | 22                   | 229             |
|               | RW     | ATACTCCCGCTGGTACTGAG      | 58.31 | 55.00 | 20                   |                 |
| <i>ULK1</i>   | FW     | TGTGCCCTCATATCCAAGCT      | 58.78 | 50.00 | 20                   | 240             |
|               | RW     | TCAGCAACTAGATCACCTGGA     | 58.18 | 47.62 | 21                   |                 |
| <i>PIK3C3</i> | FW     | GCAGTTCATCCAGTCGGTTC      | 58.92 | 55.00 | 20                   | 157             |
|               | RW     | CACACAGTATCCAGCACAGC      | 58.92 | 55.00 | 20                   |                 |
| <i>DNM2</i>   | FW     | CTCATTCCTTGCCGTCACACC     | 59.20 | 55.00 | 20                   | 196             |
|               | RW     | CCACGCCGATATAGCCTCTT      | 59.40 | 55.00 | 20                   |                 |
| <i>PROM2</i>  | FW     | GCTTCCTTGTGCAGATCCAG      | 58.91 | 55.00 | 20                   | 286             |
|               | RW     | GGCAGCTCTCCTTTTAGACG      | 58.35 | 55.00 | 20                   |                 |
| <i>APPL1</i>  | FW     | ATCCGCAGACCCAAGTTACA      | 59.02 | 50.00 | 20                   | 243             |
|               | RW     | CTGATGCCCTACGATCCAGT      | 58.96 | 55.00 | 20                   |                 |
| <i>SNX33</i>  | FW     | CAAGCACGACCTCTTCCAAA      | 58.41 | 50.00 | 20                   | 219             |
|               | RW     | AAATGGTTCATCTCGGCCTG      | 58.24 | 50.00 | 20                   |                 |
| <i>ARF1</i>   | FW     | GGCGAAATTGTGACCACCAT      | 59.11 | 50.00 | 20                   | 179             |
|               | RW     | CGCTCTGTGTCATTGCTGTC      | 59.00 | 55.00 | 20                   |                 |
| <i>VPS11</i>  | FW     | TCCAGGCCTACAACTACGG       | 59.10 | 55.00 | 20                   | 249             |
|               | RW     | TGCCATCTGTGAACCCAATG      | 58.45 | 50.00 | 20                   |                 |
| <i>VPS18</i>  | FW     | CTCGTGGTCTCCTGCAATCA      | 59.75 | 55.00 | 20                   | 163             |
|               | RW     | CCAGCAGATGAGAGCCAGTA      | 58.88 | 55.00 | 20                   |                 |
| <i>CTSB</i>   | FW     | AACCTTTGATGCACGGGAAC      | 59.04 | 50.00 | 20                   | 217             |
|               | RW     | ATAGCCACCATTACAGCCGT      | 59.16 | 50.00 | 20                   |                 |
| <i>GAPDH</i>  | FW     | GGGTCCCAGCTTAGGTTTCAT     | 59.08 | 55.00 | 20                   | 248             |
|               | RW     | CATTCTCGGCCTTGACTGTG      | 58.92 | 55.00 | 20                   |                 |

Tm: Melting temperature; bp: base pair; FW: forward; RW: reverse.

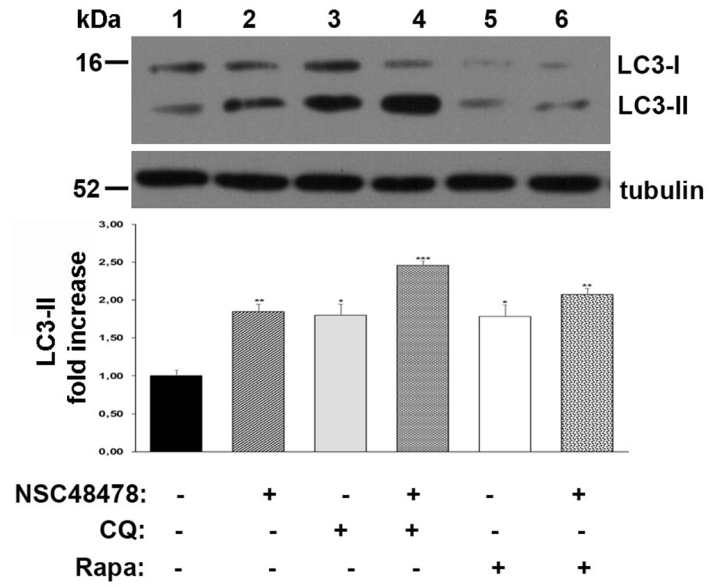

**Figure S1.** Inhibition of 37/67kDa laminin receptor induces formation of lipidated LC3-II isoform. GT1 cells were grown as in Figure 1, with the exception that here Rapamycin treatment has been shown and LC3-II quantified as in the plot, which shows the fold increase of LC3-II level respect to untreated conditions set as 1 (\*  $p < 0.05$ ; \*\*  $p < 0.01$ ; \*\*\*  $p < 0.001$ ).

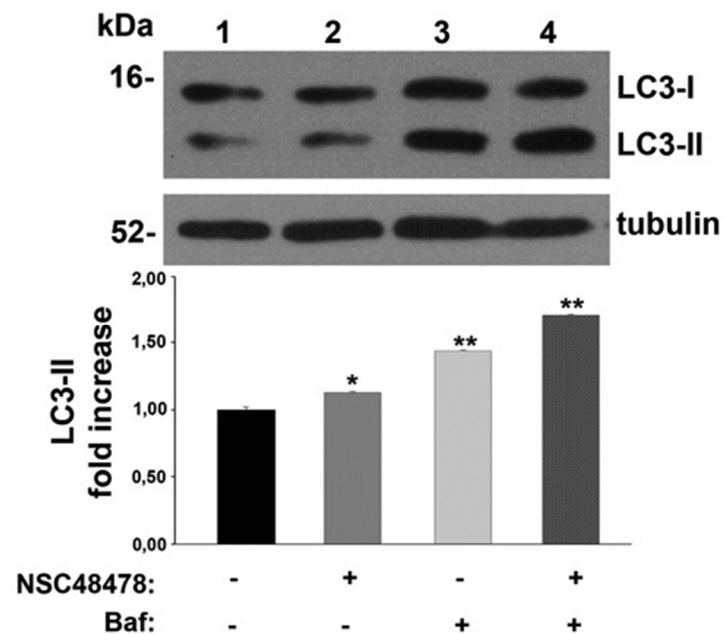

**Figure S2.** NSC48478 induces formation of lipidated LC3-II isoform. GT1 cells were grown as in Figure 1, with the exception that here Bafilomycin treatment (Baf 100 nM, 24 h) has been shown and LC3-II quantified as in the plot, which shows the fold increase of LC3-II level respect to untreated conditions set as 1 (\*  $p < 0.05$ ; \*\*  $p < 0.01$ ; \*\*\*  $p < 0.001$ ).

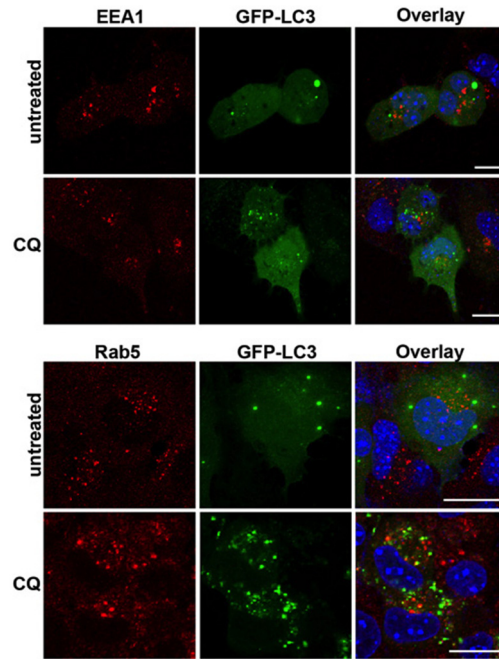

**Figure S3.** LC3 is not recruited on endosomes under CQ treatment. GFP-LC3 transfected GT1 cells were grown on dishes in 1% serum, and were left untreated, or treated with CQ (50  $\mu$ M). EEA1 and Rab5 were detected by immunofluorescence analysis. Scale bars: 10  $\mu$ M.

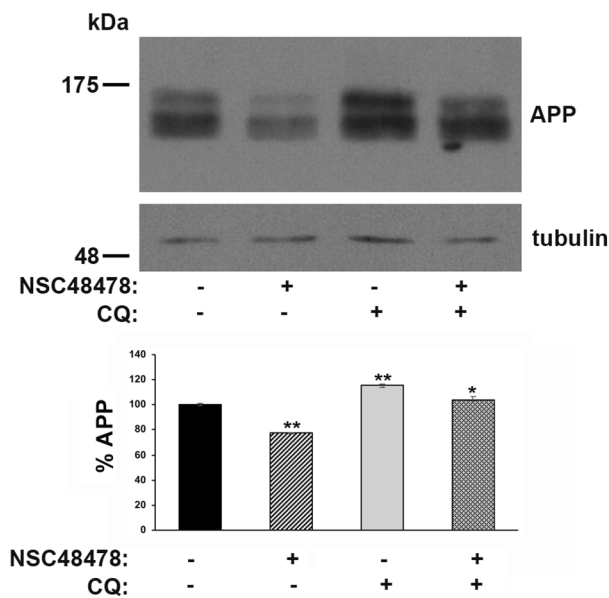

**Figure S4.** APP levels decrease after NSC48478 administration and increase after the use of CQ. GT1 cells grown on dishes in 1% serum, were left untreated (-) or treated (+) with NSC48478 and/or CQ. APP was revealed by probing the membrane with anti-APP antibody and tubulin was used as loading control. The gels are representative of three independent experiments plotted in the graph, where different densitometric analysis of bands from the gels were compared to untreated conditions, which were set as 100%. Significance is shown with asterisks (\*  $p < 0.05$ ; \*\*  $p < 0.01$ ).

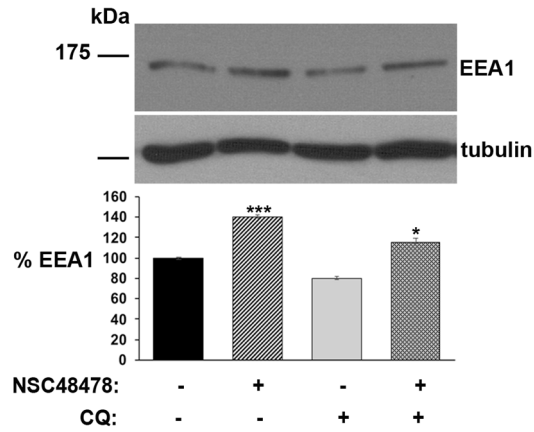

**Figure S5.** EEA1 levels increase after NSC48478 administration. GT1 cells were grown on dishes in 1% serum and were left untreated (-) or treated (+) with NSC48478 and/or CQ. EEA1 was revealed by probing the membrane with anti-EEA1 antibody and tubulin was used as loading control. Different densitometric analysis of bands from the gels were compared to untreated conditions, which were set as 100%. Significance is shown with asterisks (\*  $p < 0.05$ ; \*\*\*  $p < 0.001$ ).

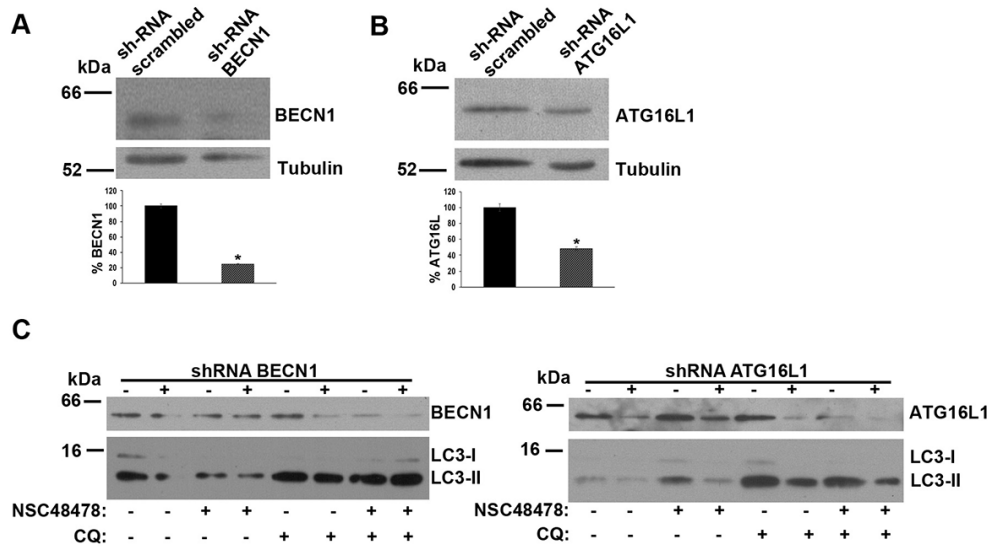

**Figure S6.** Effects of BECN1 or ATG16L1 downregulation on LC3-II formation after NSC48478 treatment. GT1 cells were transiently transfected with specific shRNAs for BECN1 (**A**) or ATG16L1 (**B**). Levels of ATG proteins were evaluated by western blotting using specific primary antibodies followed by ECL assay. Histograms in the upper panels show reduction of both BECN1 and ATG16L1 after knock down. ShRNA-GFP was used as scrambled (\*  $p < 0.05$ ) and tubulin as loading control. (**C**) After NSC48478 and/or CQ administration, levels of lipidated LC3 were evaluated by immunoblotting the same membrane both with anti-LC3 antibody and anti-BECN1 or anti-ATG16L1, in order to monitor the ATGs knock down level in the same sample.
